# Supplementary material
Source: PubMed Central journal article supplement (PMC6816687)

# Geller Supplemental Figure 10

A

| dCas9 Construct | guide RNA |
|-----------------|-----------|
|-----------------|-----------|

32 mg/ml fluconazole

|   |   |
|---|---|
| ∅ | ∅ |
|---|---|

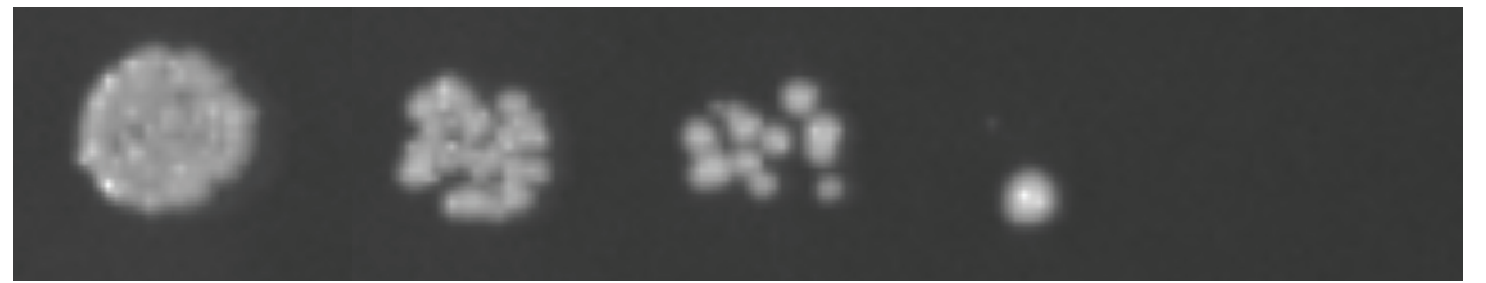

|       |   |
|-------|---|
| dCas9 | ∅ |
|-------|---|

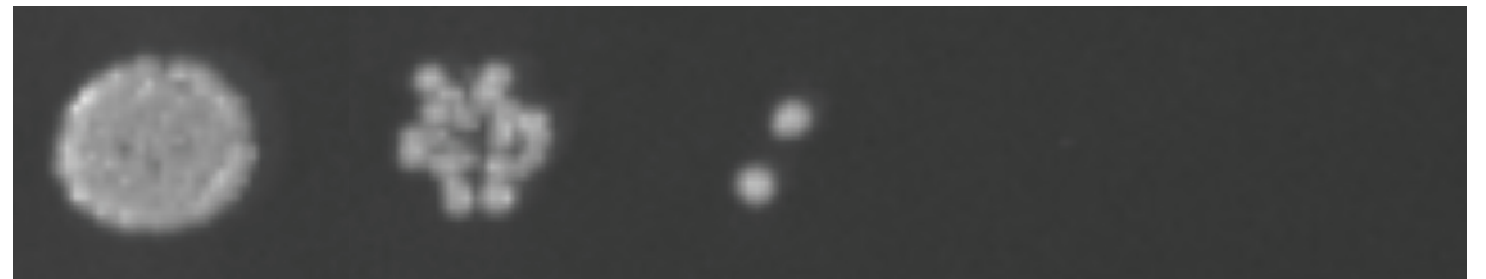

|                    |   |
|--------------------|---|
| dCas9-mRUBY2-LINuS | ∅ |
|--------------------|---|

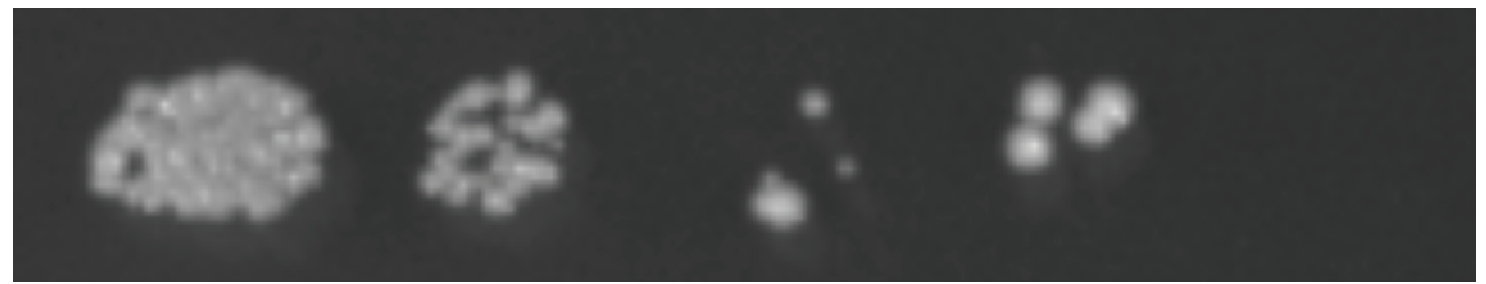

|              |   |
|--------------|---|
| dCas9-mRUBY2 | ∅ |
|--------------|---|

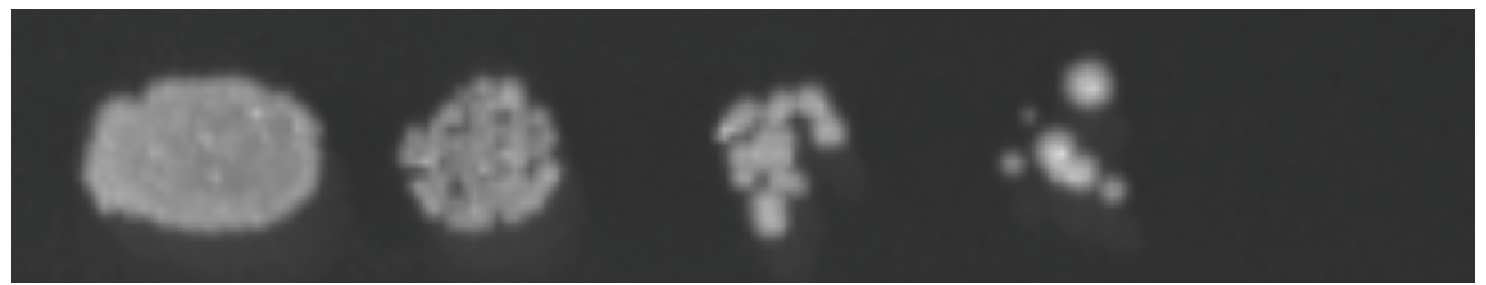

|                     |   |
|---------------------|---|
| dCas9-mR-LINuS-Mxi1 | ∅ |
|---------------------|---|

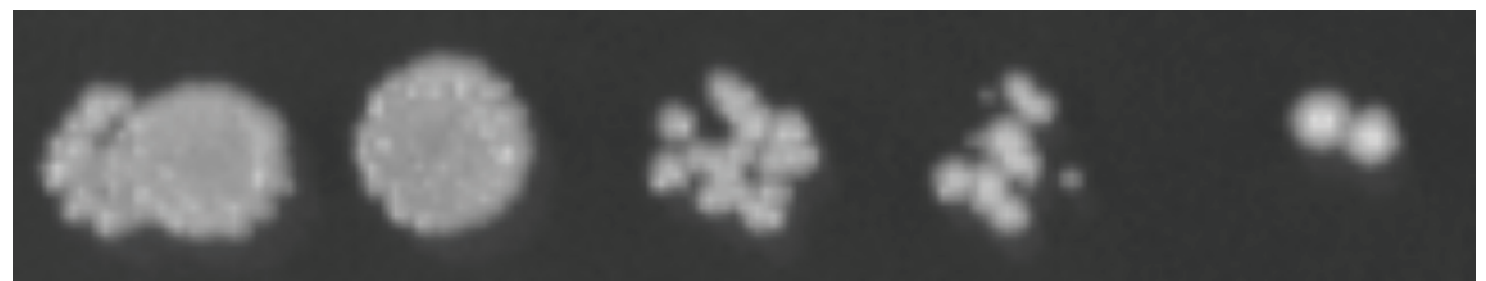

B

0 mg/ml fluconazole

|   |       |
|---|-------|
| ∅ | Erg11 |
|---|-------|

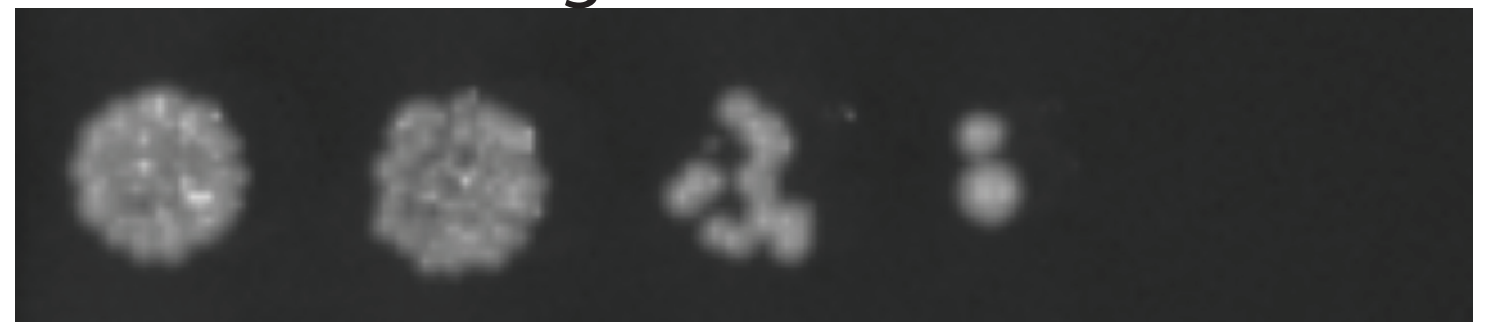

|       |       |
|-------|-------|
| dCas9 | Erg11 |
|-------|-------|

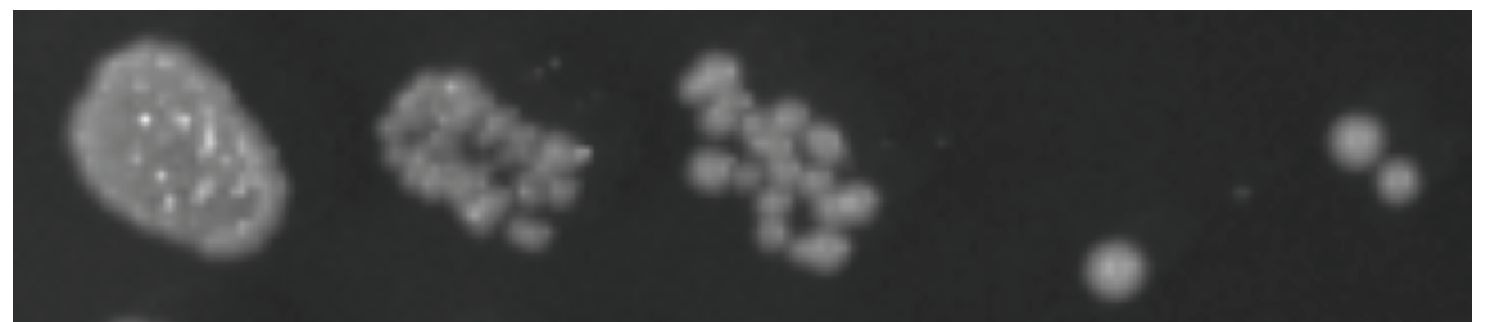

|                    |       |
|--------------------|-------|
| dCas9-mRUBY2-LINuS | Erg11 |
|--------------------|-------|

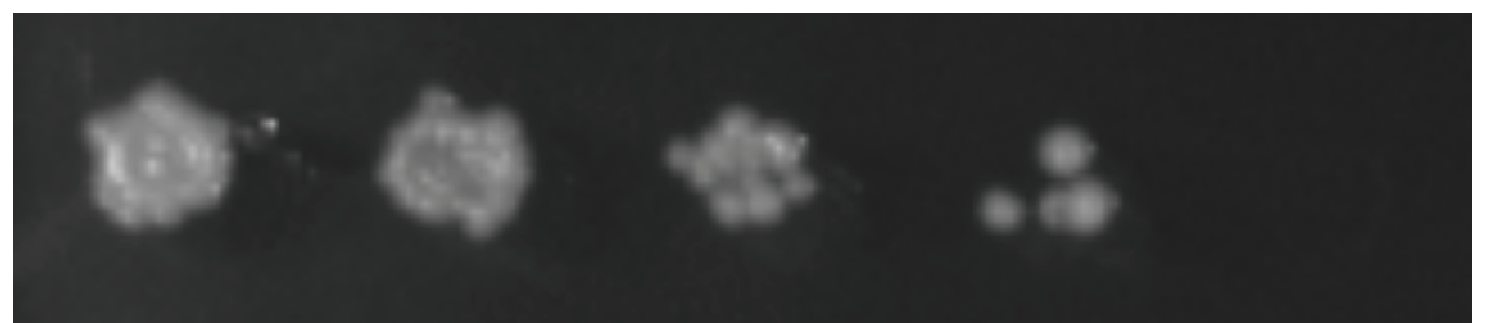

|              |       |
|--------------|-------|
| dCas9-mRUBY2 | Erg11 |
|--------------|-------|

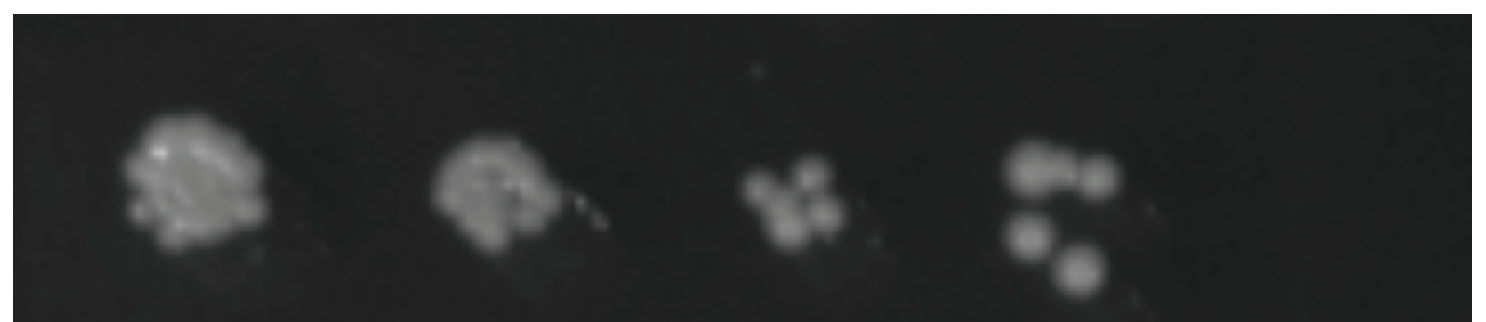

|                     |       |
|---------------------|-------|
| dCas9-mR-LINuS-Mxi1 | Erg11 |
|---------------------|-------|

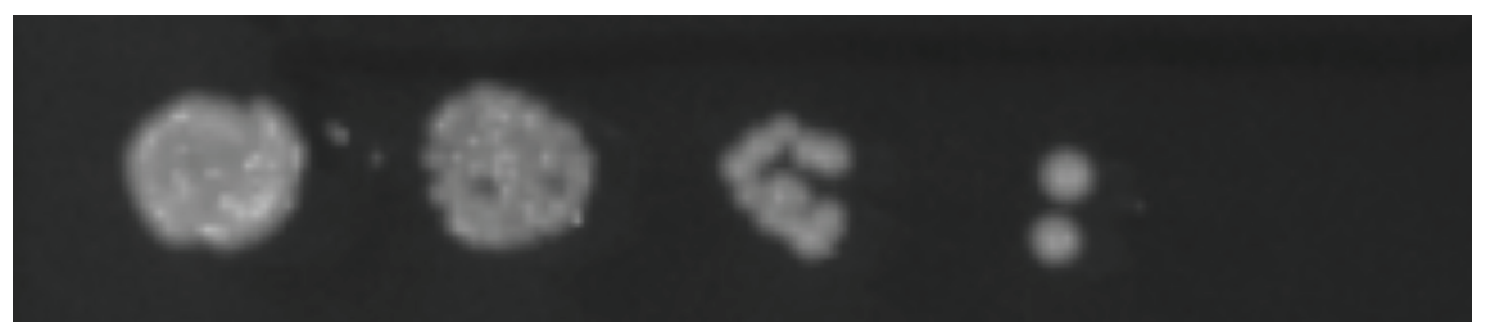

|                   |       |
|-------------------|-------|
| dCas9-Mxi1-mRUBY2 | Erg11 |
|-------------------|-------|

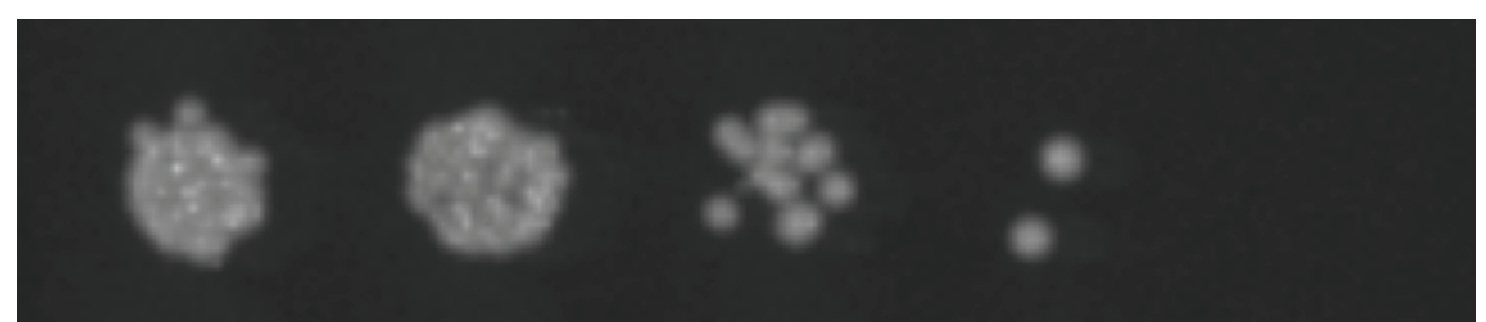

Supplement: 12195_2019_598_MOESM10_ESM.pdf [file 12195_2019_598_MOESM10_ESM.pdf]
