# Supplementary material
Source: PubMed Central journal article supplement (PMC6816687)

# Geller Supplemental Figure 1

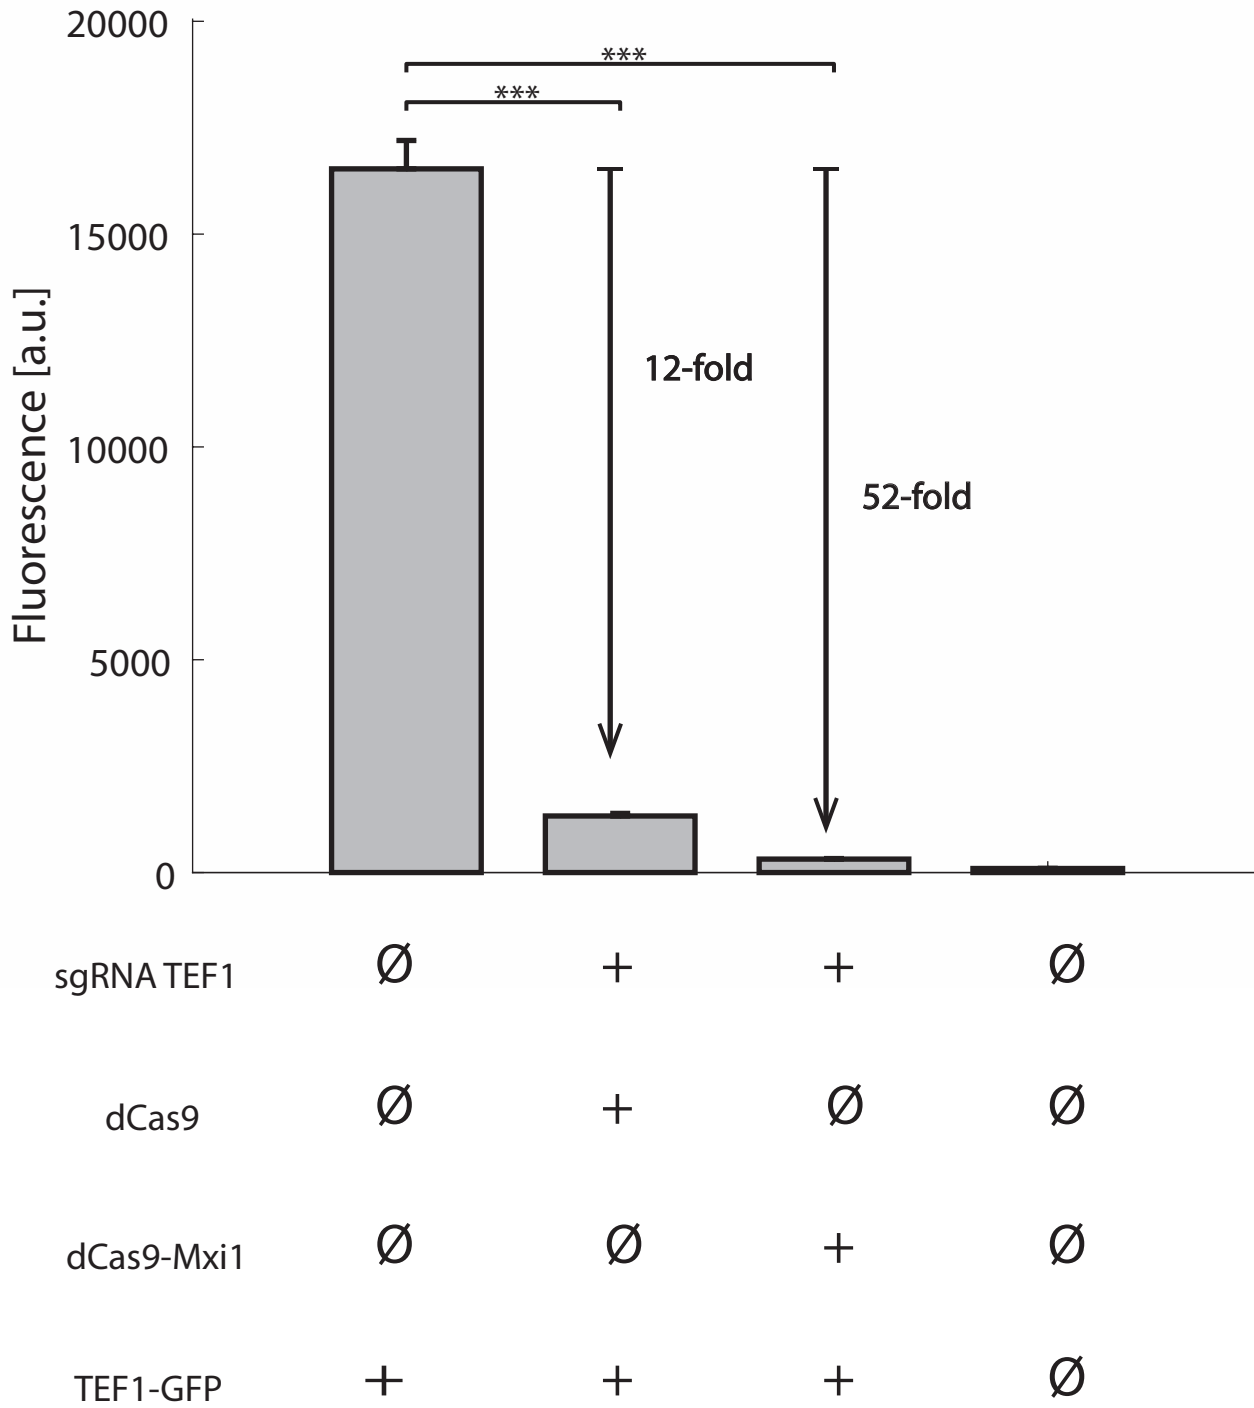

Supplement: 12195_2019_598_MOESM1_ESM.pdf [file 12195_2019_598_MOESM1_ESM.pdf]

# Geller Supplemental Figure 2

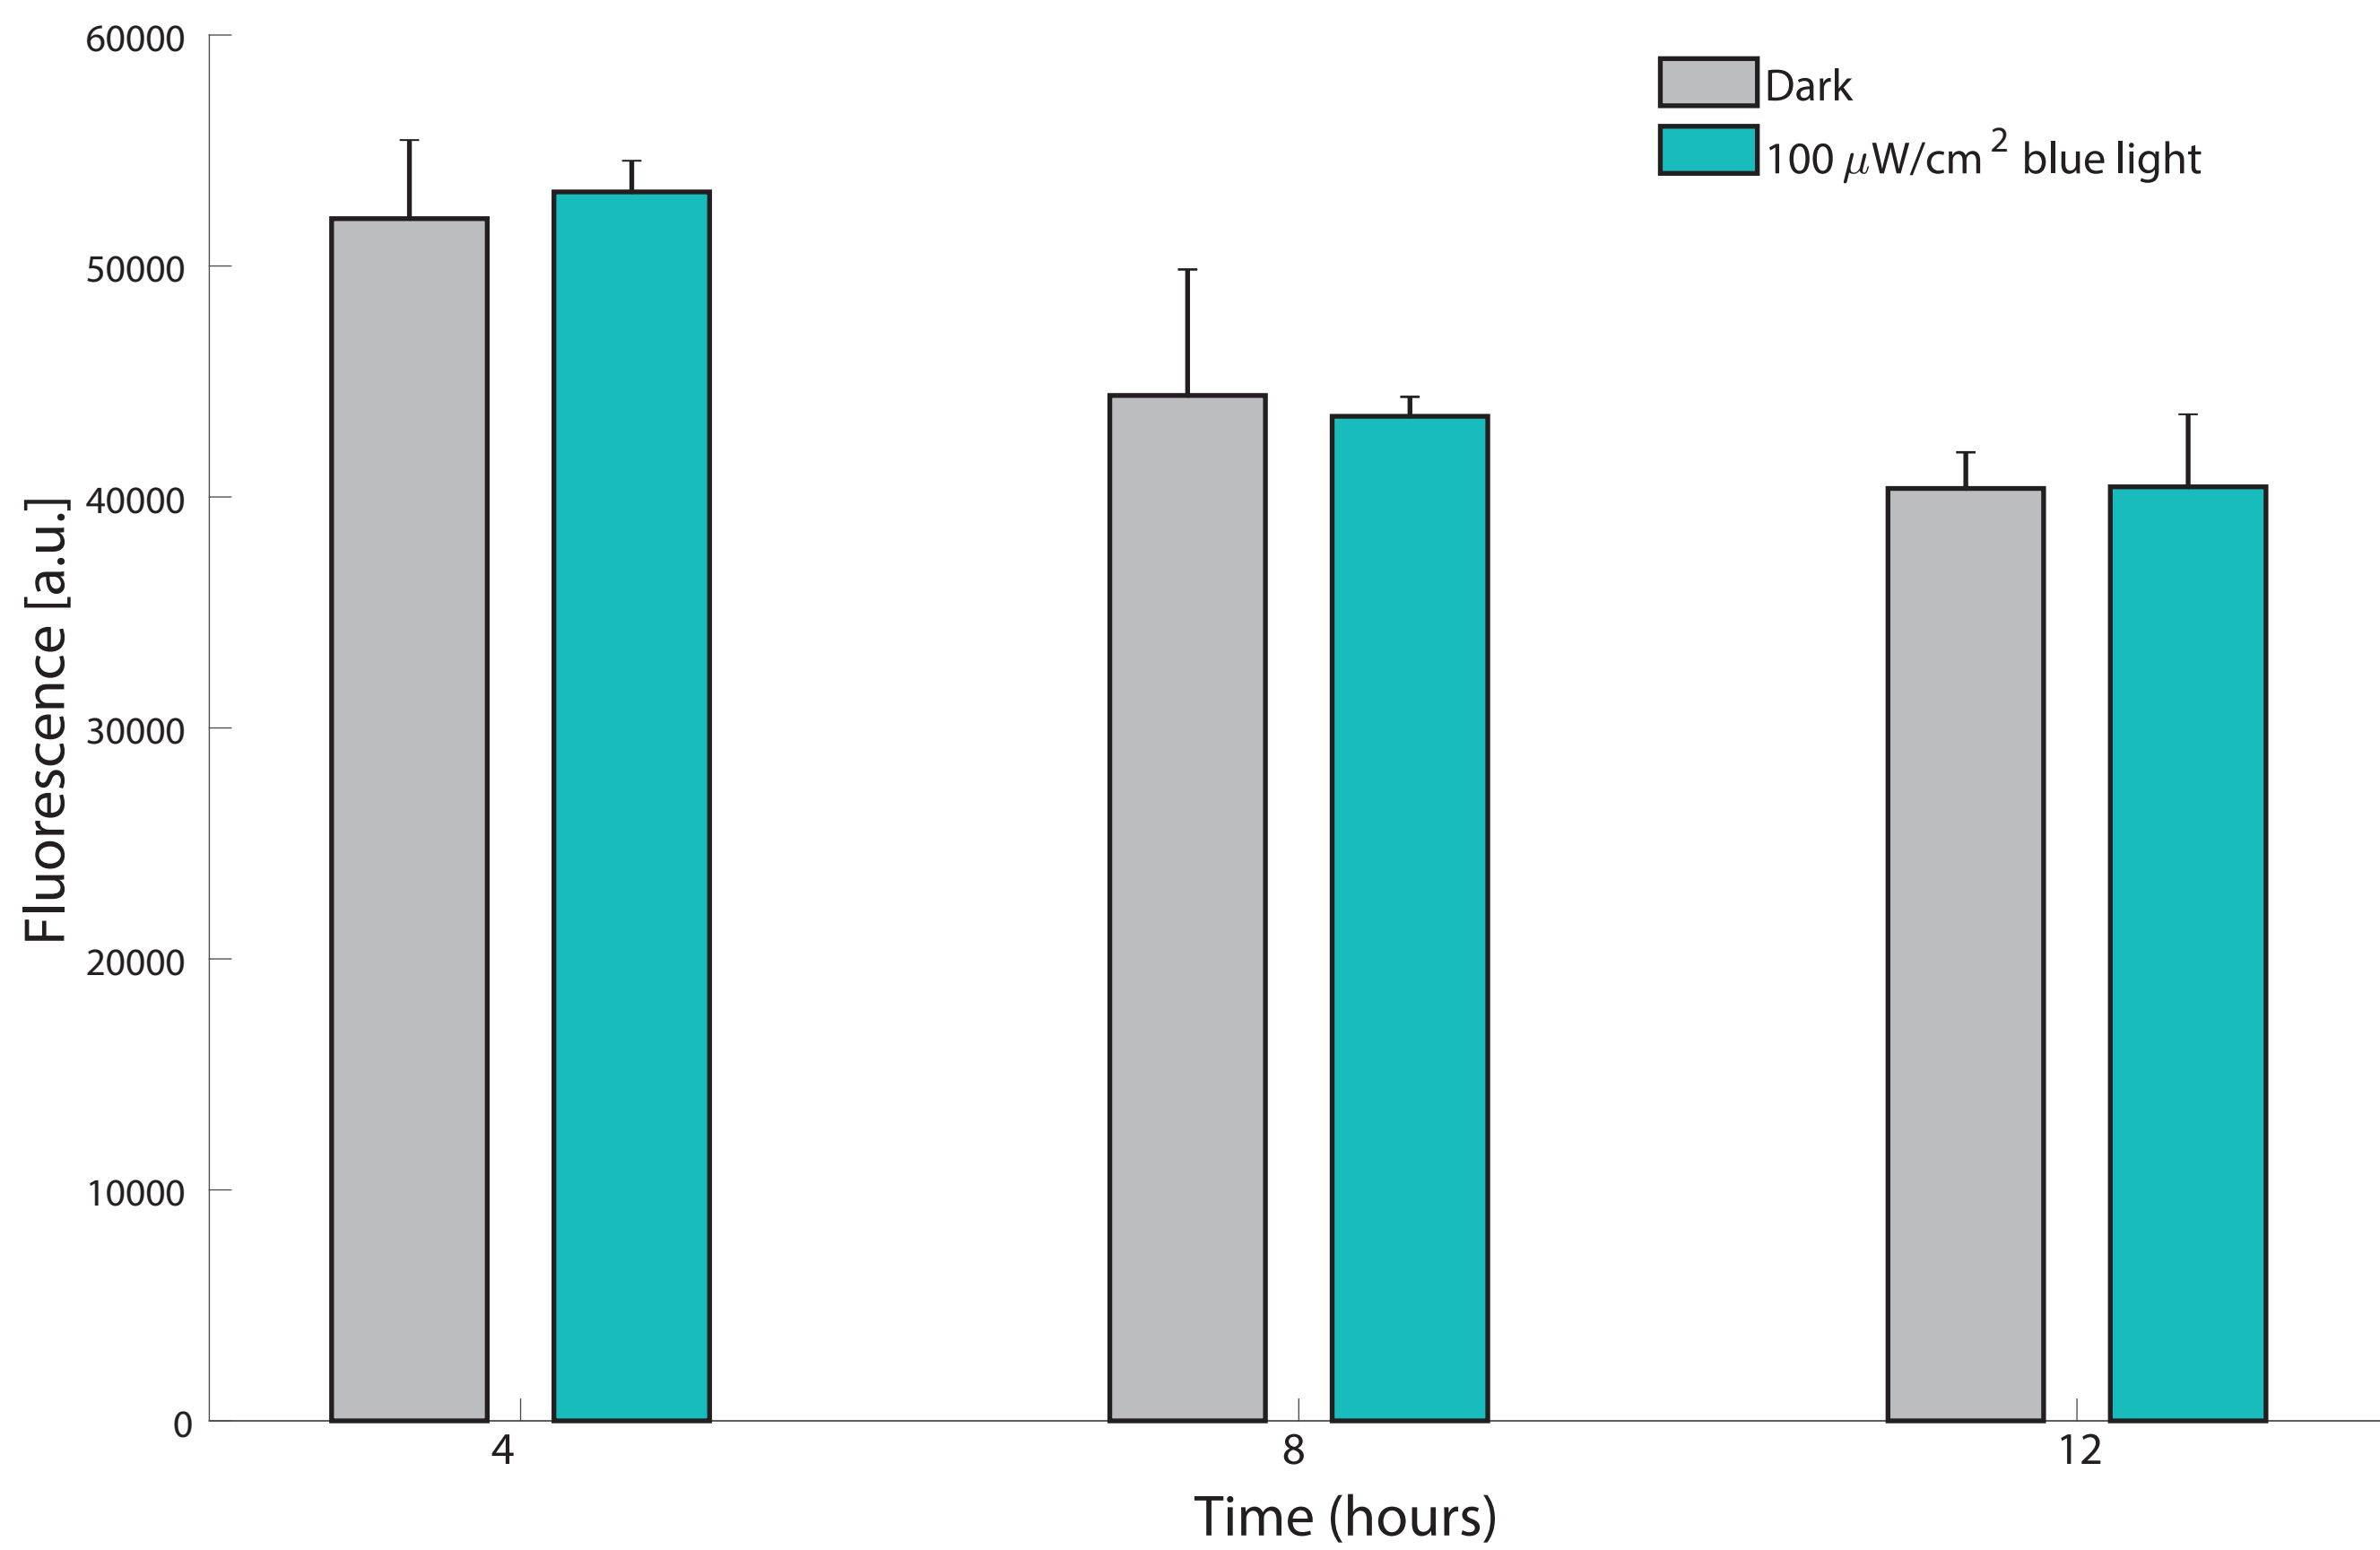

Supplement: 12195_2019_598_MOESM2_ESM.pdf [file 12195_2019_598_MOESM2_ESM.pdf]

# Geller Supplemental Figure 3

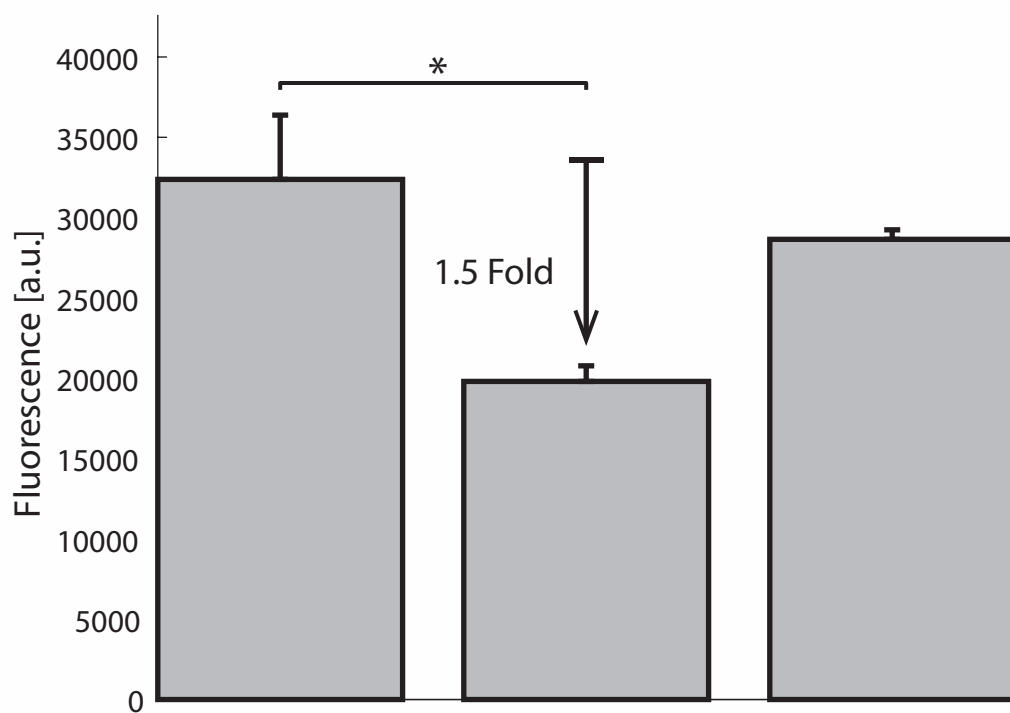

sgRNA TEF1

Ø

+

+

dCas9-LINus

Ø

+

Ø

dCas9-mCherry-LINus

Ø

Ø

+

TEF1-GFP

+

+

+

Supplement: 12195_2019_598_MOESM3_ESM.pdf [file 12195_2019_598_MOESM3_ESM.pdf]

# Geller Supplemental Figure 4

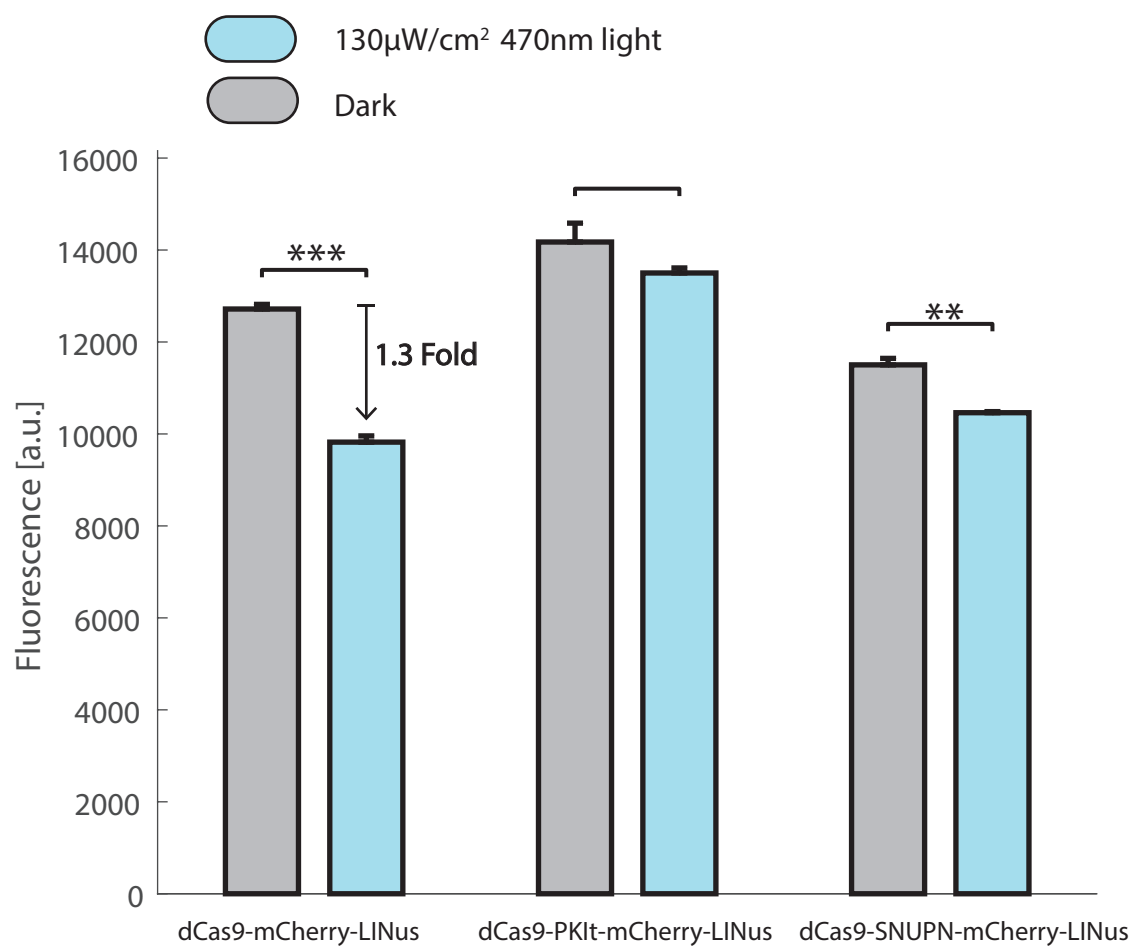

Supplement: 12195_2019_598_MOESM4_ESM.pdf [file 12195_2019_598_MOESM4_ESM.pdf]

# Geller Supplemental Figure 5

A

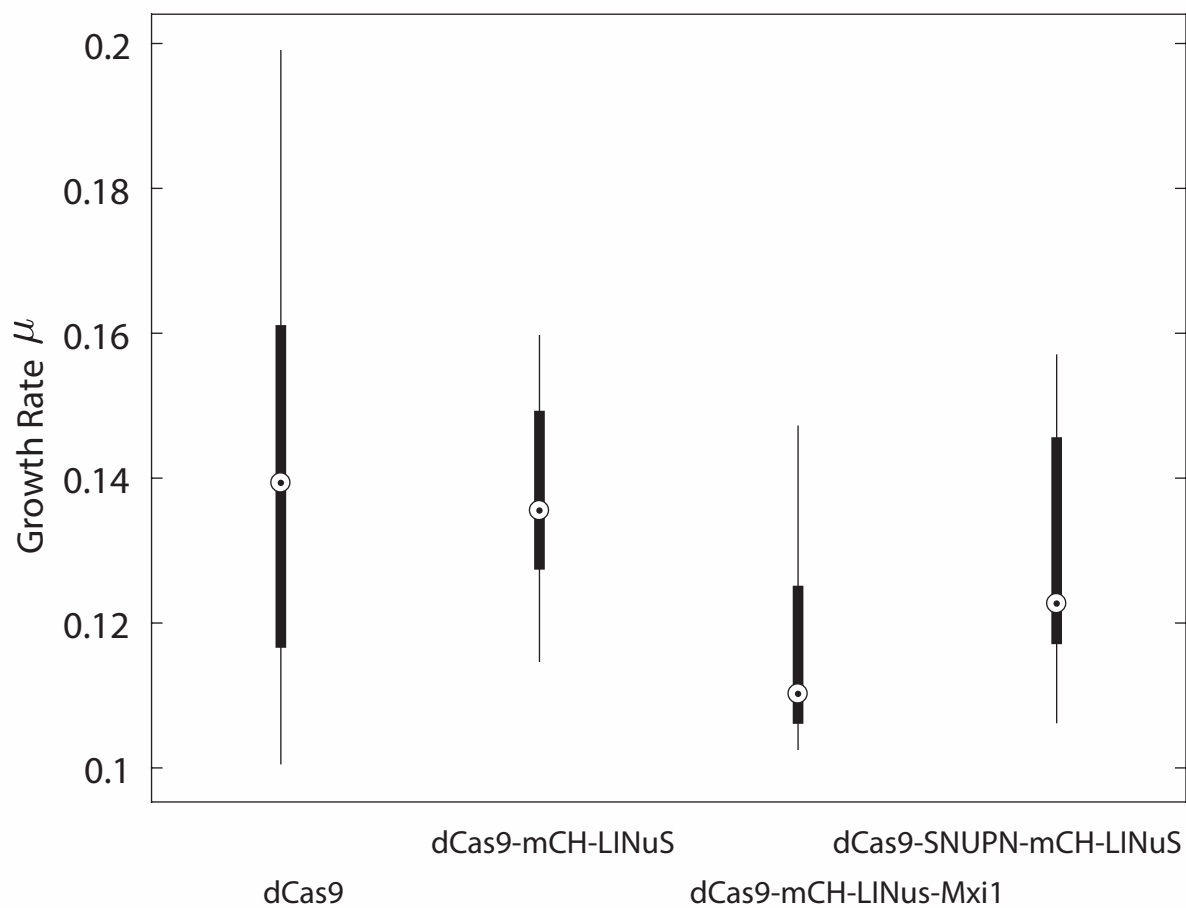

B

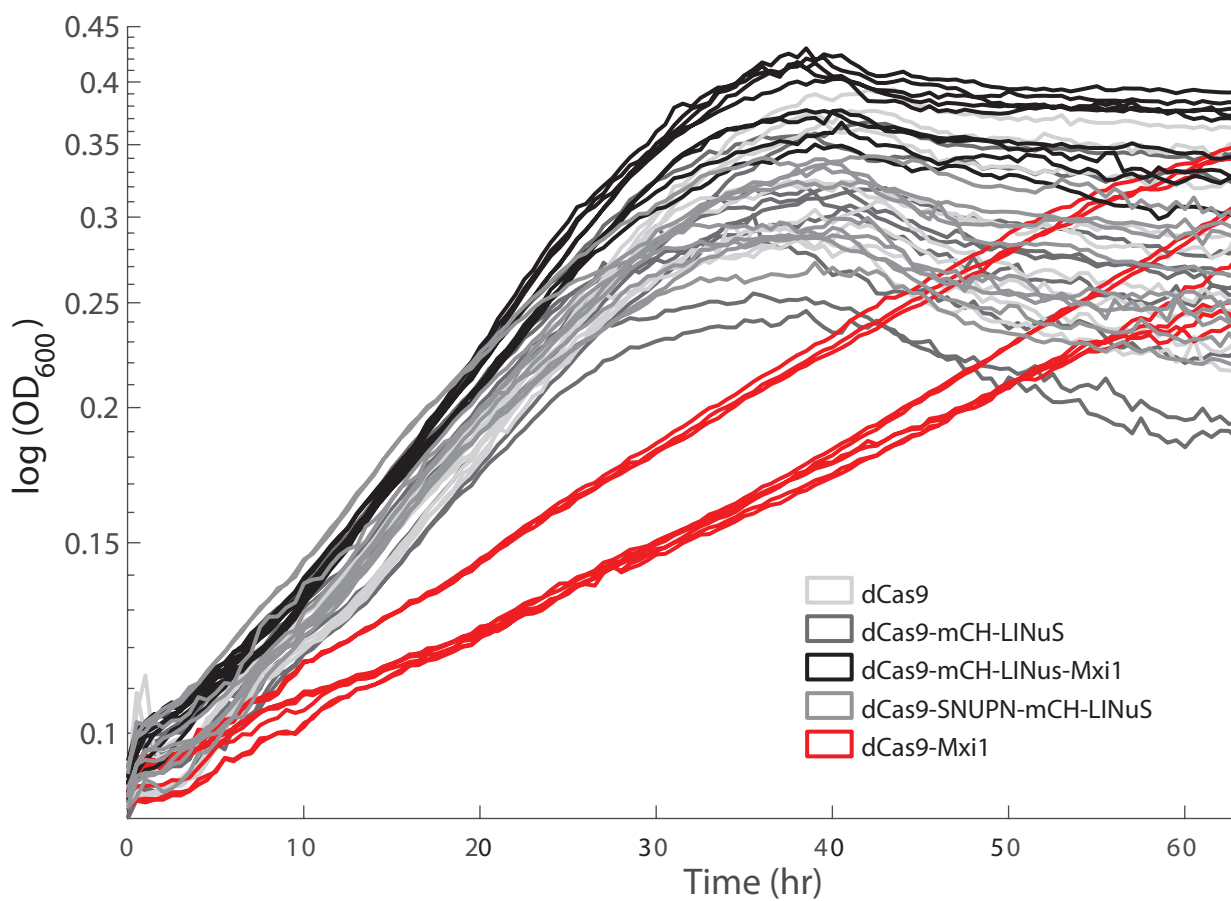

Supplement: 12195_2019_598_MOESM5_ESM.pdf [file 12195_2019_598_MOESM5_ESM.pdf]

# Geller Supplemental Figure 6

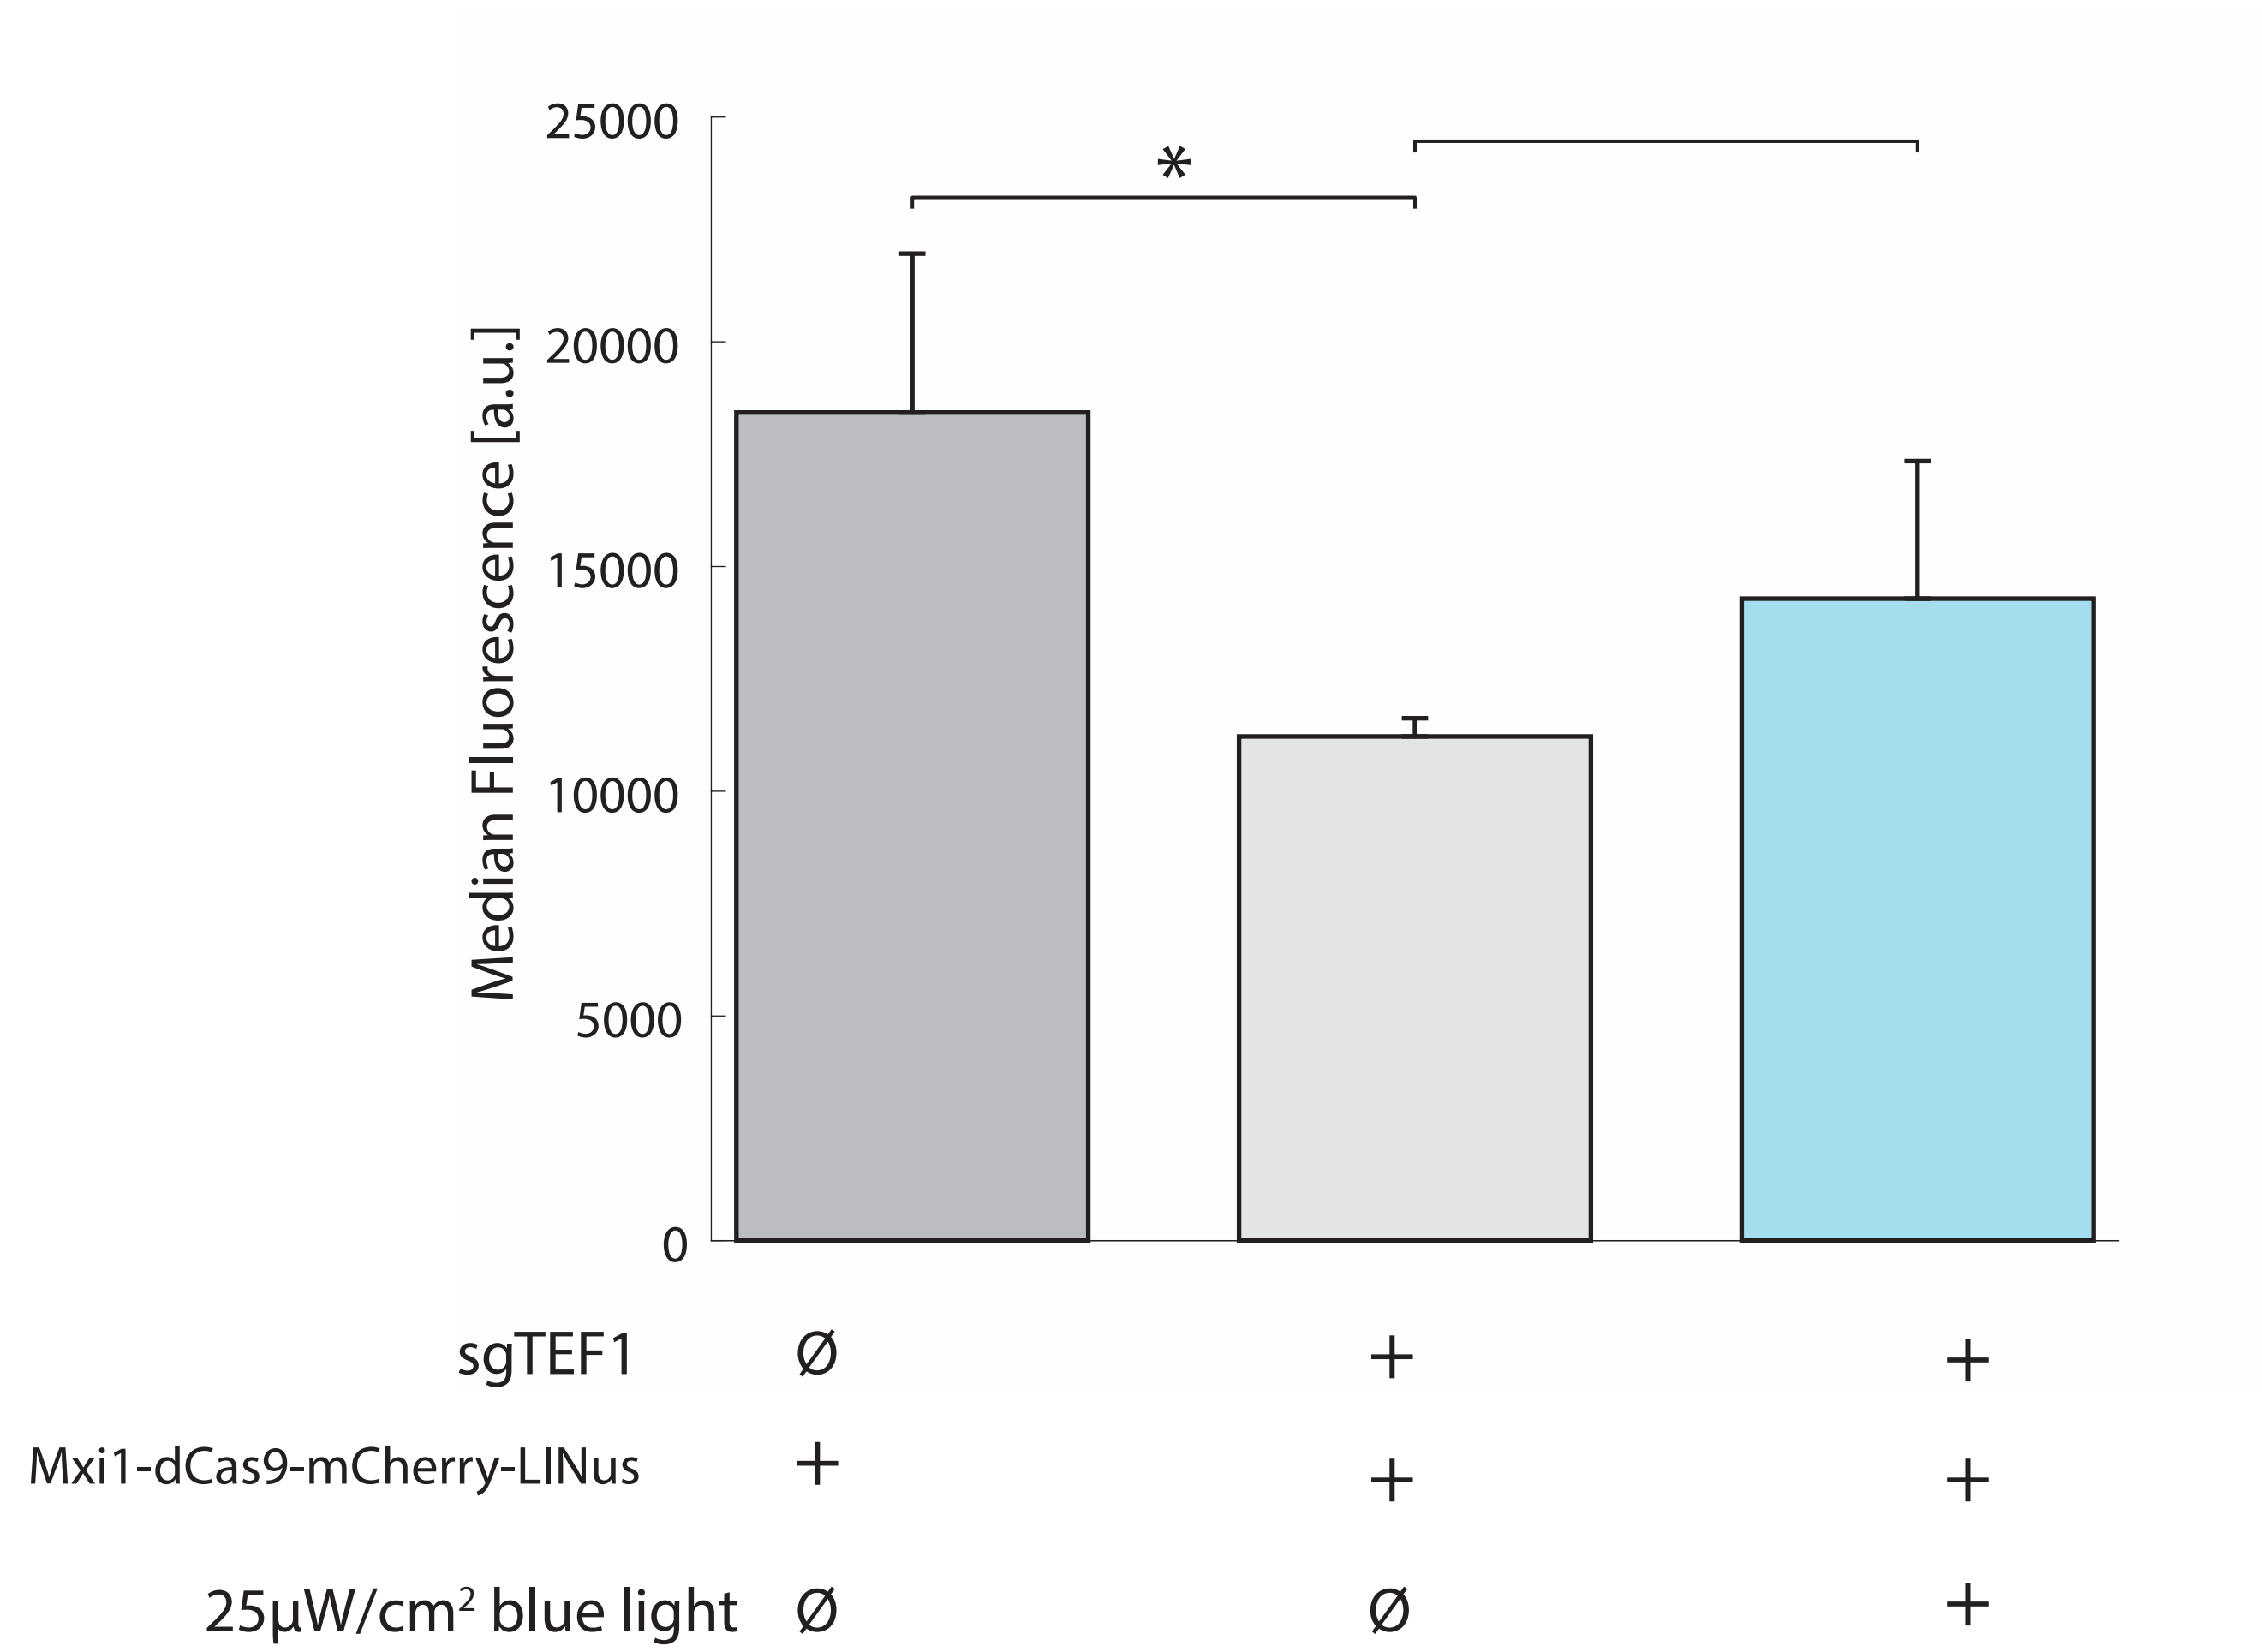

Supplement: 12195_2019_598_MOESM6_ESM.pdf [file 12195_2019_598_MOESM6_ESM.pdf]

# Geller Supplemental Figure 7

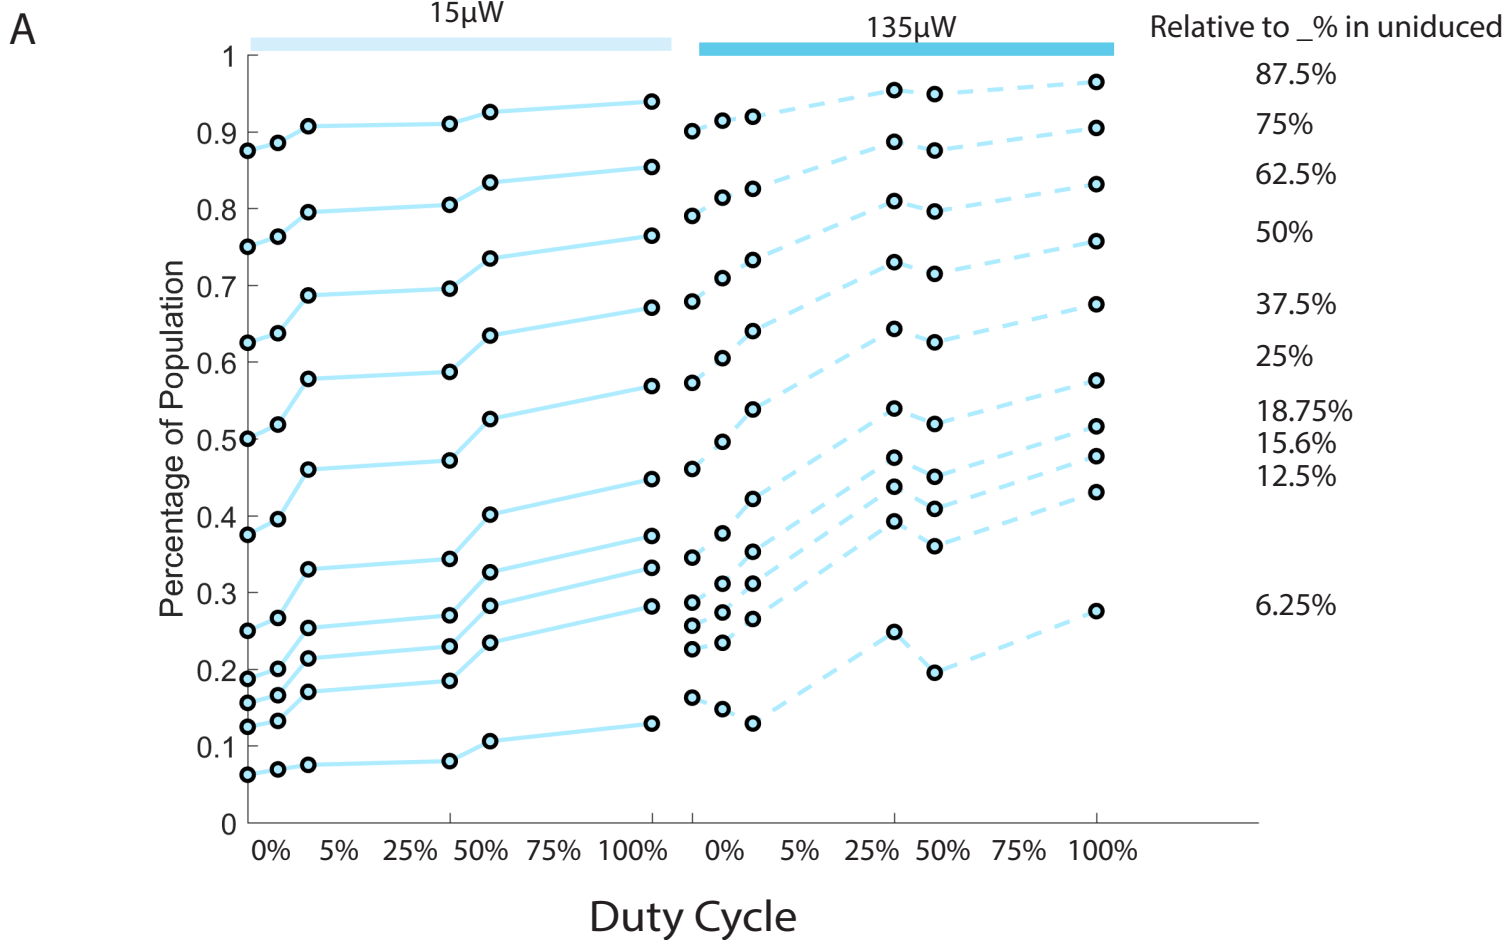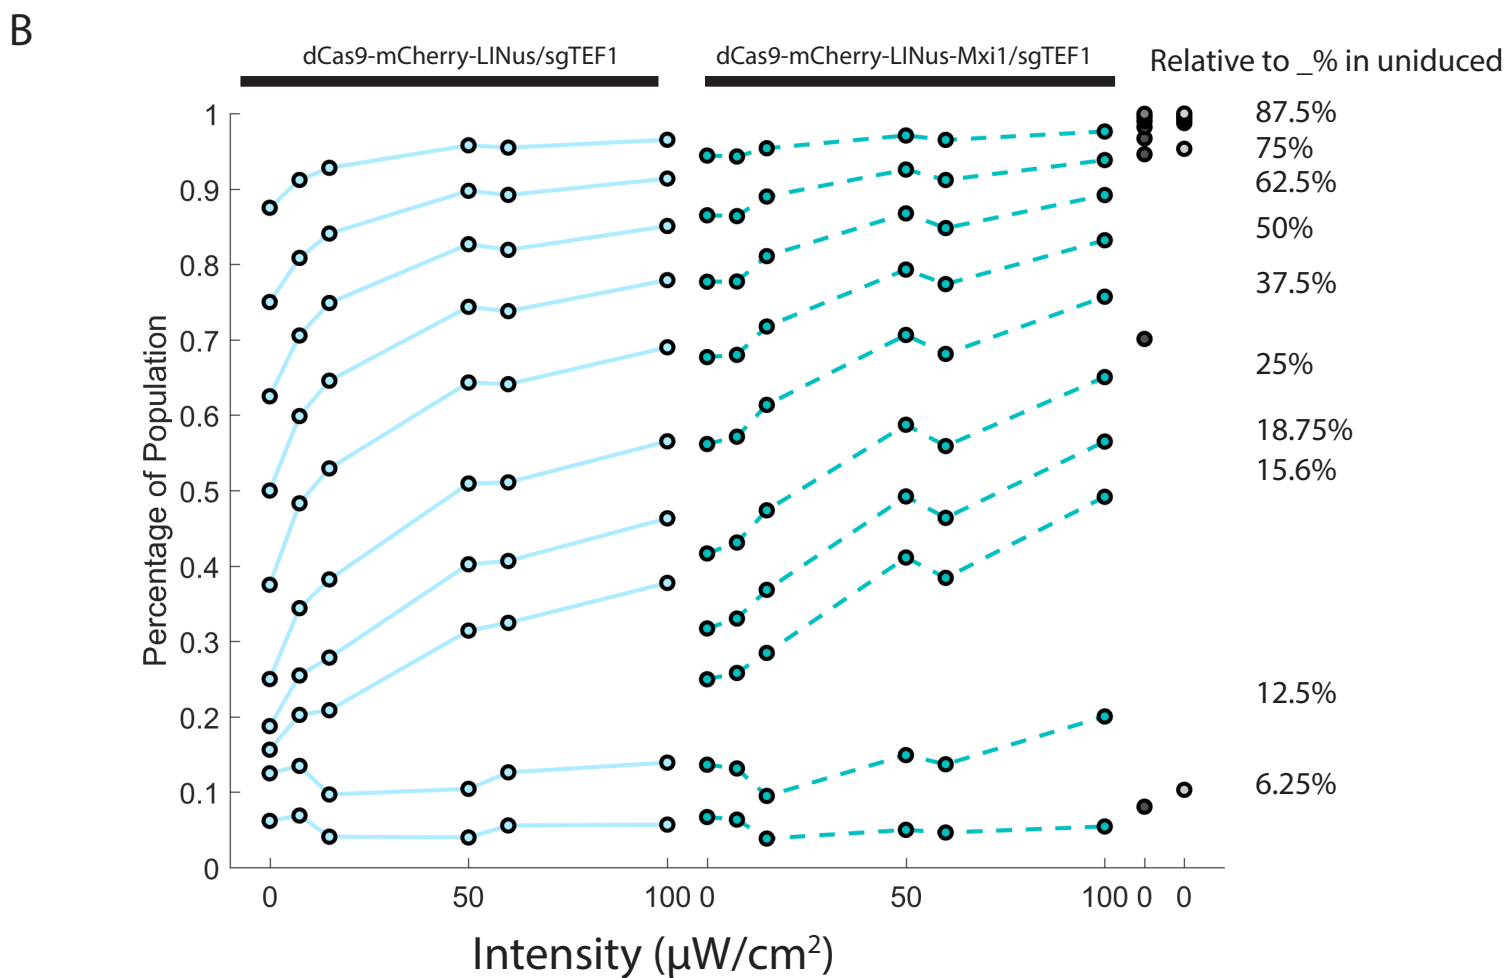

Supplement: 12195_2019_598_MOESM7_ESM.pdf [file 12195_2019_598_MOESM7_ESM.pdf]

# Geller Supplemental Figure 8

## A

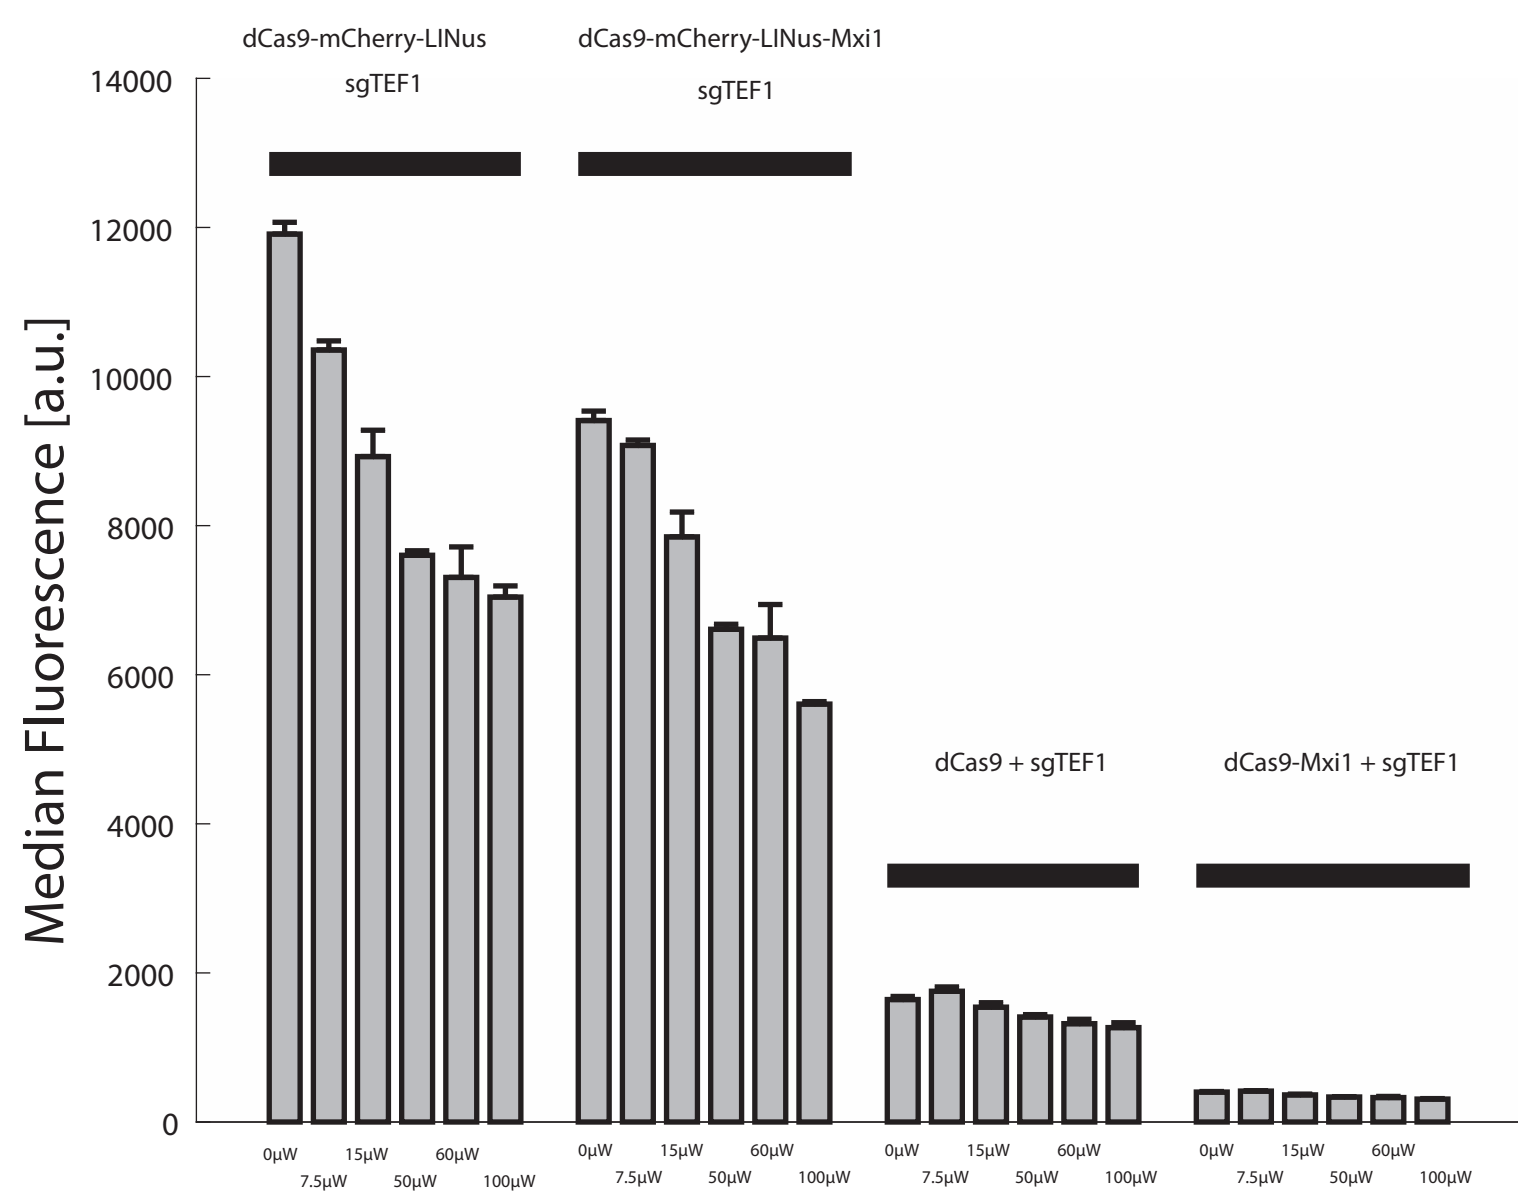

## B

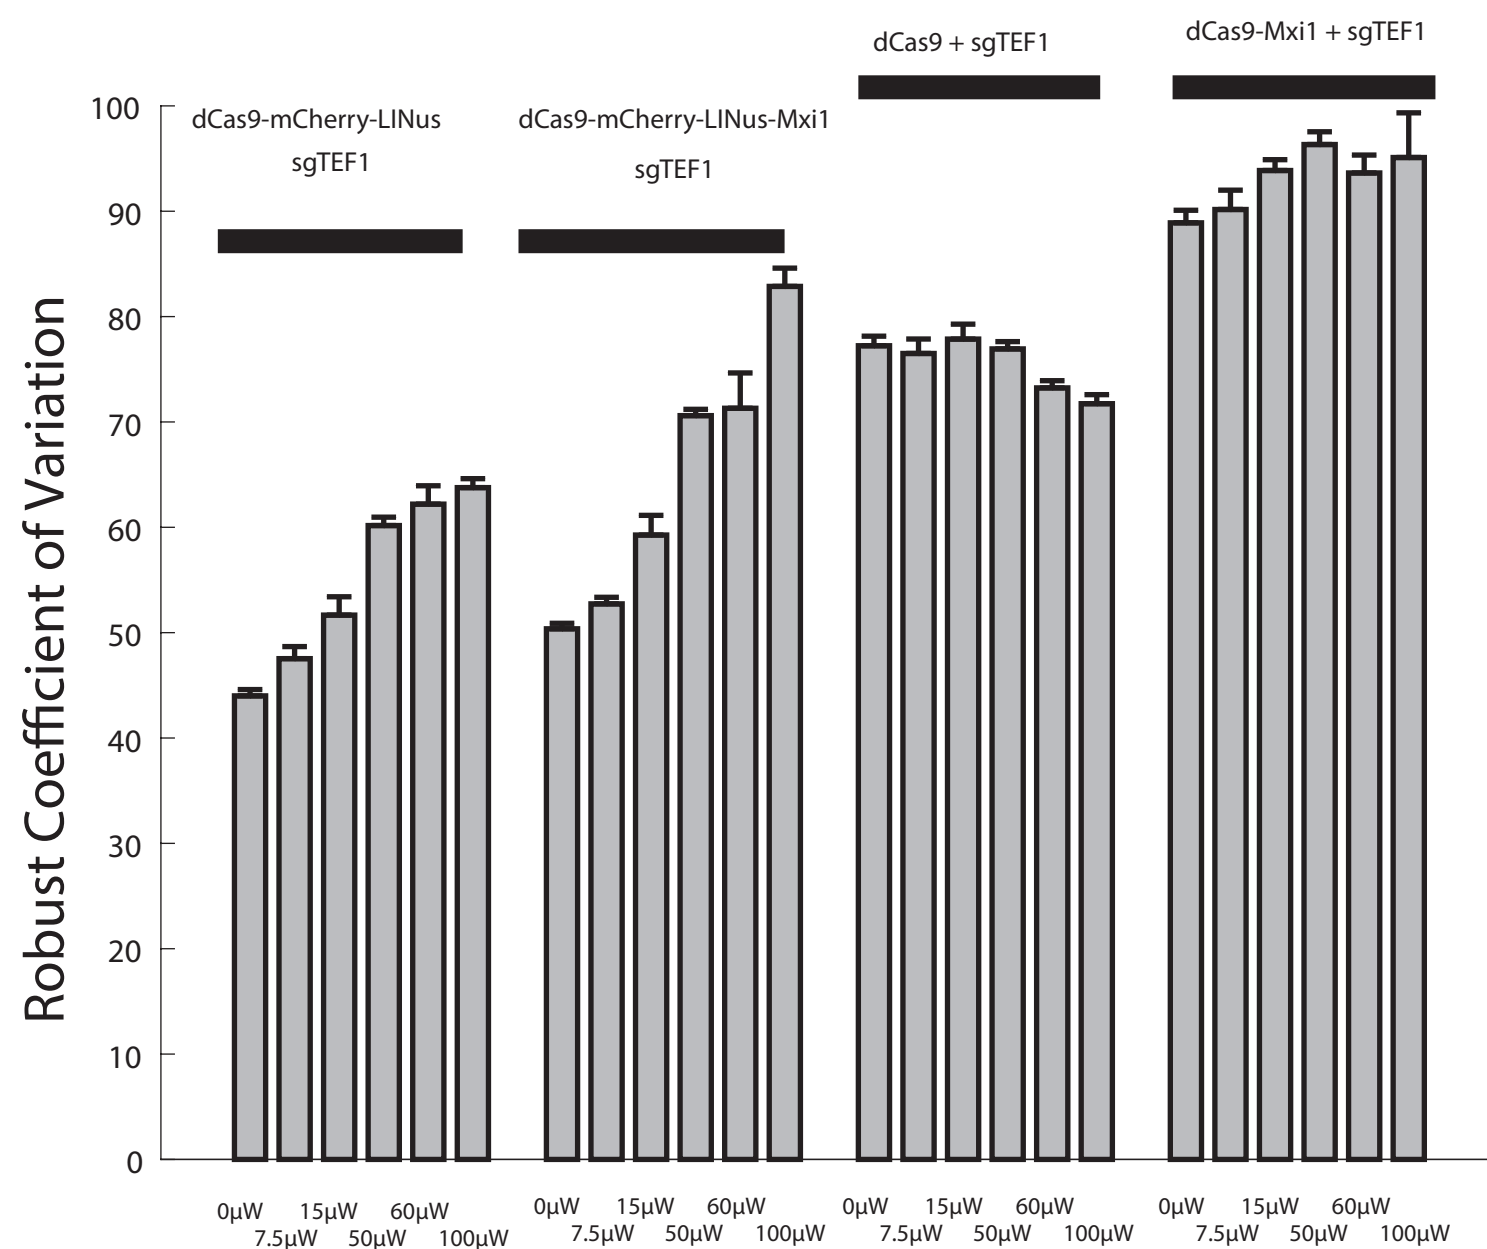

Supplement: 12195_2019_598_MOESM8_ESM.pdf [file 12195_2019_598_MOESM8_ESM.pdf]

Geller Supplemental Figure 9

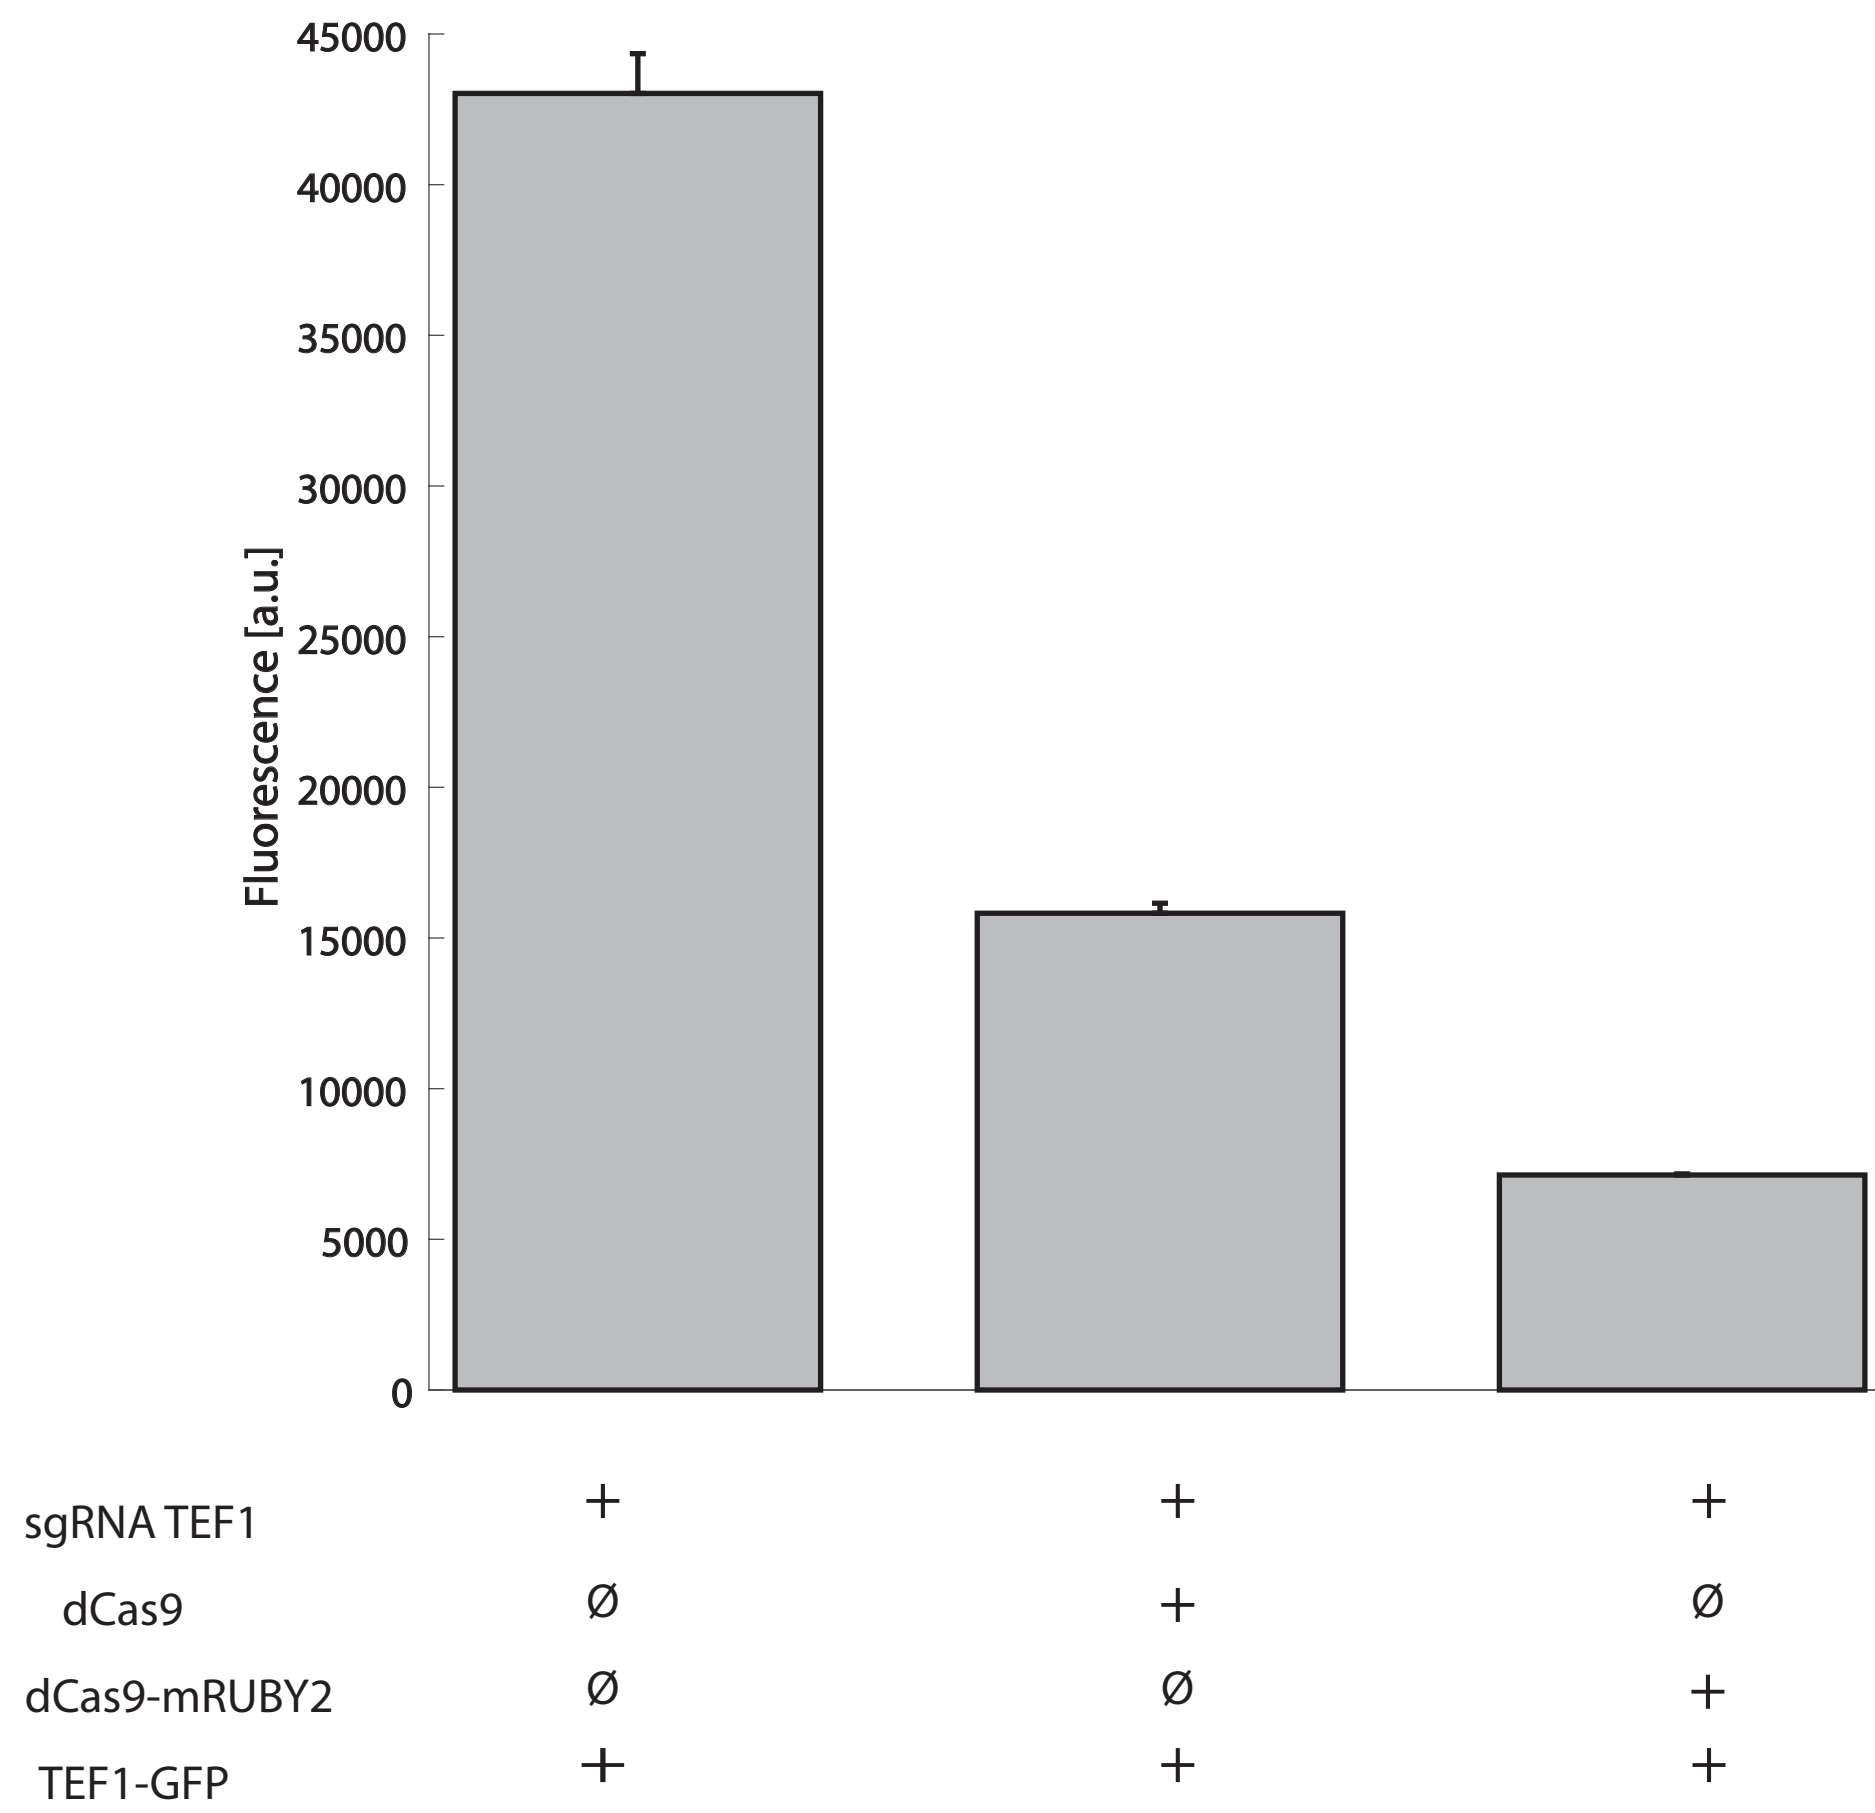

Supplement: 12195_2019_598_MOESM9_ESM.pdf [file 12195_2019_598_MOESM9_ESM.pdf]
